# Supplementary material
Source: PubMed Central journal article supplement (PMC7351415)

# THE LANCET

## Rheumatology

### Supplementary appendix

This appendix formed part of the original submission. We post it as supplied by the authors.

Supplement to: Vergnano S, Alders N, Armstrong C, et al. Severe refractory Kawasaki disease in seven infants in the COVID-19 era. *Lancet Rheumatol* 2020; published online July 10. [https://doi.org/10.1016/S2665-9913\(20\)30231-9](https://doi.org/10.1016/S2665-9913(20)30231-9).

## Appendix 1

Table 1 Demographic and clinical characteristics of the infants

|                                            | Infant 1                         | Infant 2 **              | Infant 3                                | Infant 4                                | Infant 5                            | Infant 6                               | Infant 7                       |
|--------------------------------------------|----------------------------------|--------------------------|-----------------------------------------|-----------------------------------------|-------------------------------------|----------------------------------------|--------------------------------|
| Age                                        | 5 months                         | 7 months                 | 7 months                                | 12 months                               | 12 weeks                            | 5 months                               | 4 months                       |
| Sex                                        | Male                             | Male                     | Male                                    | Male                                    | Female                              | Female                                 | Male                           |
| Ethnicity                                  | White not British                | White British            | Asian                                   | Mixed race                              | White British                       | White British                          | Asian                          |
| Symptoms at diagnosis                      |                                  |                          |                                         |                                         |                                     |                                        |                                |
| Fever                                      | For 4 days                       | Fever 3 days             | For 8 days                              | For 5 days                              | For 5 days                          | For 5 days                             | For 5 days                     |
| Rash                                       | Generalised macular erythematous | Generalised erythematous | Maculo-papular erythematous generalised | Maculo-papular erythematous generalised | Discrete macular blanching on torso | Intermittent macular rash, generalised | Polymorphous erythematous rash |
| Peeling of hands/feet                      | Yes                              | Yes                      | Yes                                     | No                                      | No                                  | No                                     | No                             |
| Bilateral not exudative conjunctivitis     | Yes                              | Yes                      | Yes                                     | Yes                                     | Yes                                 | No                                     | Yes                            |
| Lymphadenopathy                            | No                               | No                       | No                                      | No                                      | No                                  | No                                     | Yes                            |
| Strawberry tongue/red lips/pharyngitis     | Yes                              | Yes                      | Yes                                     | No                                      | No                                  | Yes                                    | Yes                            |
| Oedema/periungual peeling of hands or feet | No                               | Yes                      | Yes                                     | Yes                                     | No                                  | No                                     | No                             |
| Prominent BCG site                         | Not vaccinated                   | n/a                      | Recent swelling and scabbed             | Yes                                     | Not vaccinated                      | Not vaccinated                         | Not vaccinated                 |
| Other                                      | Very irritable                   | None                     | Vomiting, diarrhoea and cough           | Miserable/irritable                     | Diarrhoea lethargic                 | Diarrhoea                              | None                           |
| Complete Kawasaki *                        |                                  | Yes                      | Yes                                     |                                         |                                     |                                        | Yes                            |
| Incomplete Kawasaki                        | Yes                              |                          |                                         | Yes                                     | Yes                                 | Yes                                    |                                |
| Investigations                             |                                  |                          |                                         |                                         |                                     |                                        |                                |

|                         |                                      |                                                                                   |                                         |                                      |                                     |                                           |                                     |
|-------------------------|--------------------------------------|-----------------------------------------------------------------------------------|-----------------------------------------|--------------------------------------|-------------------------------------|-------------------------------------------|-------------------------------------|
| CXR                     | Normal                               |                                                                                   |                                         |                                      | R upper lobe changes                | Normal                                    | Mild peribronchial thickening       |
| BC                      | Negative                             | Negative                                                                          | Negative                                | Negative                             | Negative – CoNS contaminant         | Negative                                  | Negative                            |
| CSF                     | Negative (incl virology)             | Not done                                                                          | Not done                                | Not done                             | Negative (incl virology)            | Not done                                  | Negative (incl virology)            |
| Urine                   | Negative                             |                                                                                   | Negative                                |                                      | Not done                            |                                           | Negative                            |
| ASOT and antiDNase      | Negative                             | Negative                                                                          | Negative                                | Negative                             | Not done                            | Not done                                  | Not done                            |
| COVID 19 PCR            | Not done                             | Negative                                                                          | Negative                                | Positive                             | Negative                            | Negative                                  | Negative                            |
| COVID 19 serology       | Negative                             | Negative                                                                          | Negative                                | n/a                                  | Negative                            | Positive                                  | Negative                            |
| Respiratory viral panel | Negative                             | Adenovirus positive                                                               | Negative                                | Negative                             | Negative                            | Negative                                  | Rhinovirus positive                 |
| EBV serology            | Negative                             | Negative                                                                          | Not done                                | Negative                             | Not done                            | Not done                                  | Not done                            |
| CMV                     | Negative                             | Negative                                                                          | Negative on respiratory PCR             | Negative                             | Not done                            | Not done                                  | Not done                            |
| Stool virology          | Negative                             | Not done                                                                          | Negative                                | Not done                             | Not done                            | Not done                                  | Not done                            |
| Echocardiogram          |                                      |                                                                                   |                                         |                                      |                                     |                                           |                                     |
| Coronary arteries       | Bilateral coronary artery dilatation | Bilateral giant coronary artery aneurysms                                         | Left coronary artery aneurism           | RCA aneurism                         | Normal                              | Bilateral giant coronary artery aneurysms | LAD mild dilatation                 |
| Z score at discharge    | RCA: + 7.42<br>LMCA + 9.41<br>LDA    | RCA coronary + 20<br>LMCA +29<br>LDA + 50                                         | RCA +2.2<br>LMCA +5.2<br>LAD+17.5       | RCA +5.50<br>LMCA +4.18<br>LAD +2.43 | RCA +1.6<br>LMCA +1.05<br>LAD +1.52 | RCA +20 LCA +23                           | RCA +2.2<br>LMCA +0.89<br>LAD +4.14 |
| Cardiac function        | Normal                               | Normal                                                                            | Normal                                  | Normal                               | Normal                              | Normal                                    | Normal                              |
| Treatment               |                                      |                                                                                   |                                         |                                      |                                     |                                           |                                     |
| IVIG doses              | 2 (day 4 and day 5 of fever) 2 g/kg  | 2 (day 3 and day 7 of fever)                                                      | 1 (day 8 of fever)                      | 2 (day 5 and day 7 of fever)         | 2 (day 5 and 5) 2 g/kg              | 1 (day 5) 2g/kg                           | 1 (day 5)                           |
| Methylprednisolone      | 30mg/kg for 3 days (day 5 of fever)  | 20mg/kg for 3 days given twice (day 11 of fever and day 18 from onset of illness) | 0.8mg/kg BD for 7 days (day 8 of fever) | 2mg/kg/day from day 7                | 10mg/kg day 5 for 5 days            | 2mg/kg (day 7 then 10mg/kg on day 10)     | 10mg/kg (day 6 for 3 days)          |
| Oral steroid course     | Yes                                  |                                                                                   |                                         |                                      | Yes                                 | Yes                                       | Yes                                 |

| Biological agent             | Infliximab - 5mg/kg (day 10 of fever and day 45 from onset of illness) | Infliximab - 5mg/kg (day 20 from onset of illness) | Infliximab - 6mg/kg (Day 15 of fever) | Infliximab - 5mg/kg (day 8 of fever) | Anakinra- 2mg/kg BD on day 6 for 3 days | Anakinra - 2mg/kg BD (day 7)<br>Infliximab - 5mg/kg Day 12 | Infliximab - 3mg/kg (Day 8 of fever) |
|------------------------------|------------------------------------------------------------------------|----------------------------------------------------|---------------------------------------|--------------------------------------|-----------------------------------------|------------------------------------------------------------|--------------------------------------|
| Aspirin                      | High dose initially then 5 mg/kg                                       | High dose initially then 5 mg/kg                   | High dose initially then 5 mg/kg      | High dose initially then 5 mg/kg     | High dose initially                     | 5mg/kg on day 5                                            | High dose initially then 5 mg/kg     |
| Low molecular weight heparin | Yes                                                                    | Yes                                                | Yes                                   | Yes                                  | No                                      | Yes                                                        | No                                   |
| Warfarin                     | No                                                                     | No                                                 | Yes                                   | No                                   | No                                      | Yes                                                        | No                                   |
| Clopidogrel                  | No                                                                     | Yes                                                | Yes                                   | No                                   | No                                      | No                                                         | No                                   |

\* Complete Kawasaki Fever for at least 5 days, and <sup>3</sup> 4 of 1. strawberry tongue or red lips or redness of oral and pharyngeal mucosa; 2.Rash; 3.Bilateral non exudative conjunctivitis; 4. Cervical lymphadenopathy >1.5 cm of diameter; Erythema/oedema or periungual peeling of hands and feet \*\* Infant died

**Figure 1 a and b** – a. Unfixed heart showing a giant aneurysm of the left main stem and left anterior descending coronary arteries. Area of perforation labelled with arrow.  
b. Left anterior descending coronary artery showing vasculitis without significant fibrinoid necrosis. The remains of the vessel wall are visible on the right (with a pink rim) with a large saccular aneurysm present on the left of the image [H&E, x25].

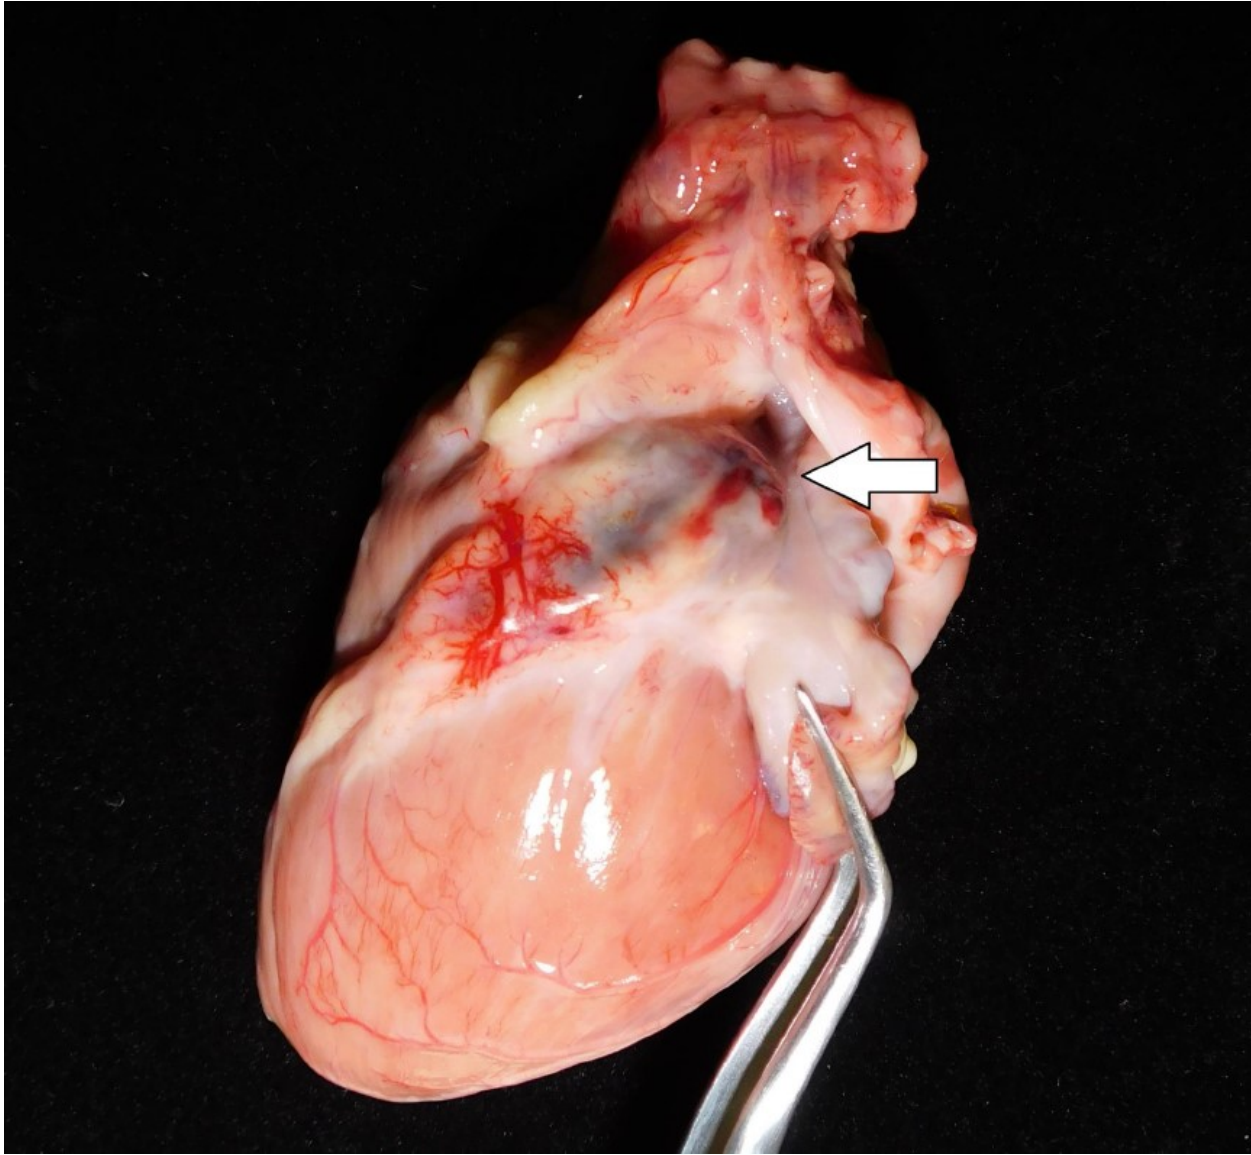

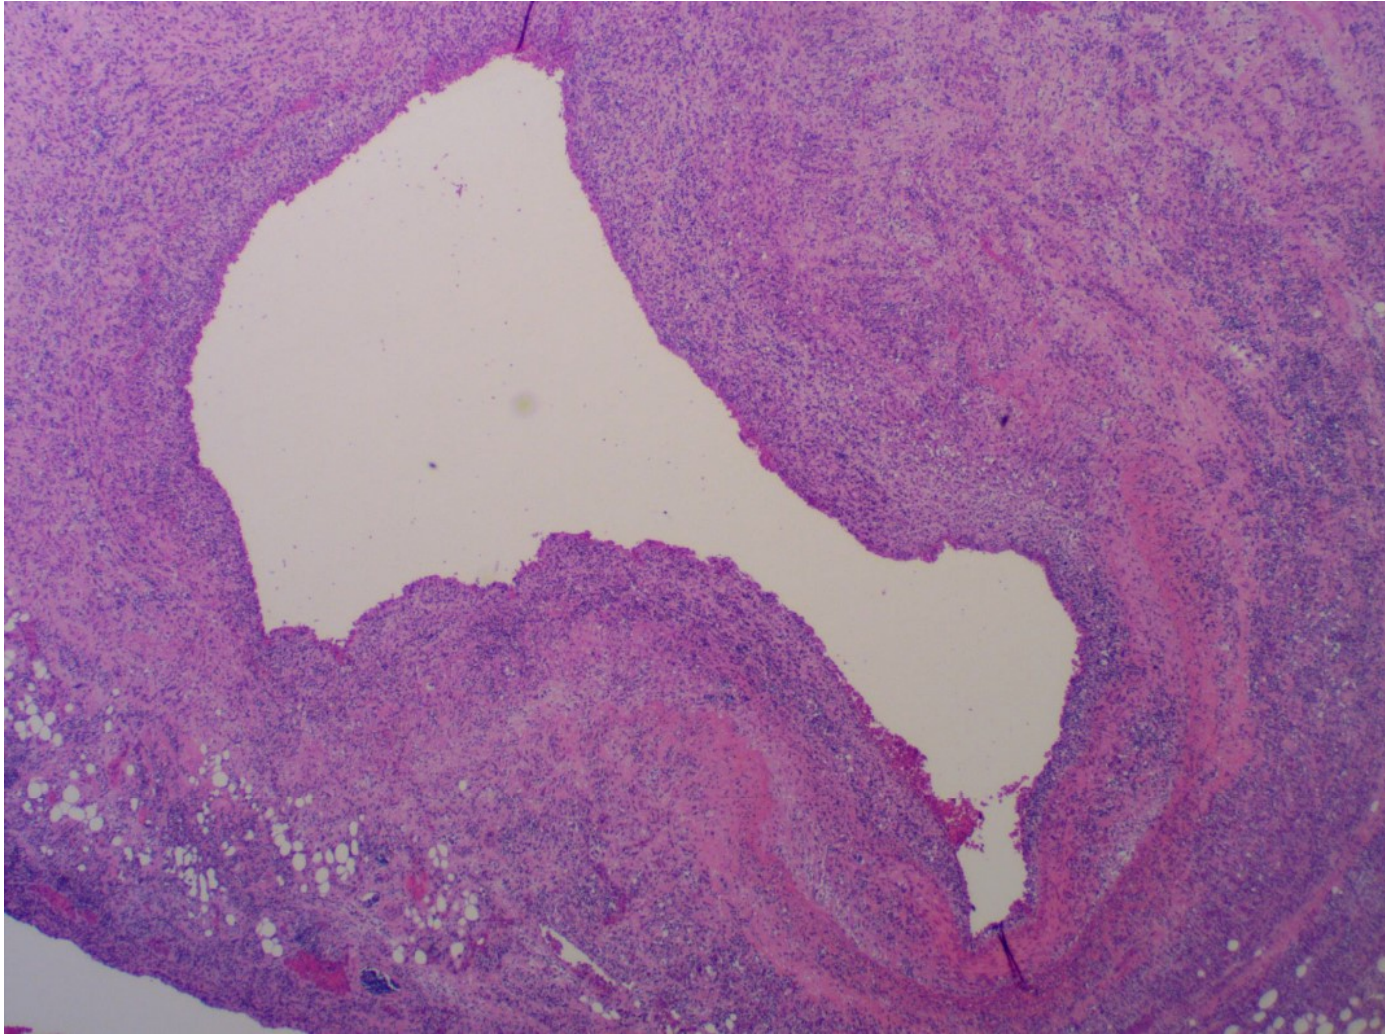

Supplement: mmc1.pdf [file mmc1.pdf]
